# Supplementary material for: A non-nitric acid method of adipic acid synthesis: organic solvent- and promoter-free oxidation of cyclohexanone with oxygen over hollow-structured Mn/TS-1 catalysts
Source: Royal Society of Chemistry journal article supplement (doi:10.1039/c4gc02333a), 2015-01-01
Supplement: c4gc02333a1.pdf [file c4gc02333a1.pdf]

## Supplementary data

# A non-nitric acid method of adipic acid synthesis: organic solvent- and promotor-free oxidation of cyclohexanone with oxygen over hollow-structured Mn/TS-1 catalysts

Guoqiang zou Wenzhou Zhong\*, Liqiu Mao, Qiong Xu, Jiafu Xiao, Dulin yin\*, Zisheng Xiao, Tao Shu

National & Local United Engineering Laboratory for New Petrochemical Materials & Fine Utilization of Resources, Hunan Normal University, Changsha 410081, P. R. China

**Table S1** Comparison between the novel catalyst and the others reported previously.

| Catalyst                                                             | Conv. | AA Sele. | Oxidant        | Temp. | Solvent                          | Reference |
|----------------------------------------------------------------------|-------|----------|----------------|-------|----------------------------------|-----------|
| Mn-HTS                                                               | 68.4  | 93.1     | O <sub>2</sub> | 90    | No                               | This work |
| Pt/Carbon/monolith                                                   | 100   | 22       | O <sub>2</sub> | 140   | Water                            | [1]       |
| Pt/Carbon                                                            | 100   | 38.8     | O <sub>2</sub> | 140   | Acetic acid/water                | [2]       |
| Mn(OAc) <sub>2</sub>                                                 | 99.8  | 75       | O <sub>2</sub> | 65    | Acetic acid/CF <sub>3</sub> COOH | [3]       |
| Mn(NO <sub>3</sub> ) <sub>2</sub> /Co(NO <sub>3</sub> ) <sub>2</sub> | 97.5  | 93.4     | O <sub>2</sub> | 40    | Acetic acid/HNO <sub>3</sub>     | [4]       |
| Co/Mn cluster                                                        | 97.6  | 86.6     | O <sub>2</sub> | 100   | Acetic acid/water                | [5]       |
| H <sub>5</sub> PMo <sub>10</sub> V <sub>2</sub> O <sub>40</sub>      | 99    | 51       | O <sub>2</sub> | 70    | Acetic acid/water                | [6]       |
| H <sub>7</sub> PMo <sub>8</sub> V <sub>4</sub> O <sub>40</sub>       | 98    | 55       | O <sub>2</sub> | 60    | Acetonitrile/methanol            | [7]       |

[1] E. Crezee, F. Kapteijn and J. A. Moulijn, *Catal. Today*, 2001, 69, 283–290.

[2] M. Besson, F. Gauthard, B. Horvath and P. Gallezot, *J. Phys. Chem. B*, 2005, 109, 2461–2467

[3] M. Constantini and L. Krumenacker, *FR Patent 2541993*, 1983 (patent held by Rhone Poulenc).

[4] C. Fumagalli, F. Minisci and R. Pirola, *WO Patent 01/87815*, 2001 (patent held by Lonza SpA).

[5] S. A. Chavan, D. Srinivas and P. Ratnasamy, *J. Catal.* 2002, **212**, 39–45.

[6] A. Atlamsani, J.-M. Brégeault and M. Ziyad, *J. Org. Chem.*, 1993, **58**, 5663–5665.

[7] J.M. Brégeault, E.A. Bassam and J. Martin, *US Patent 4983767*, 1991 (patent held by Rhone Poulenc Chimie).

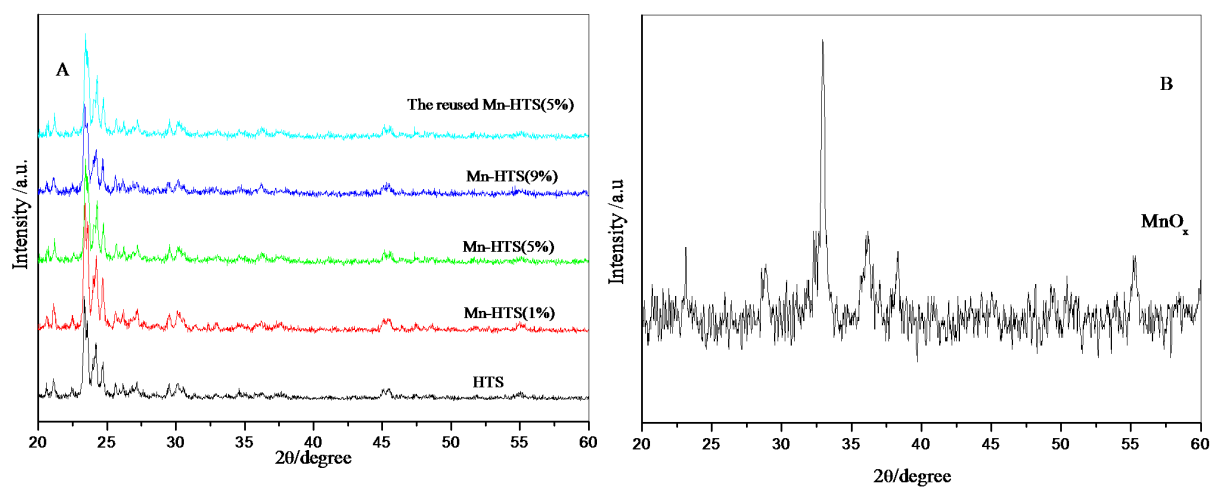

**Fig. S1** XRD of samples parent HTS, the xMn-HTS, the reused Mn-HTS(5%) (A) and MnO<sub>x</sub> (B)

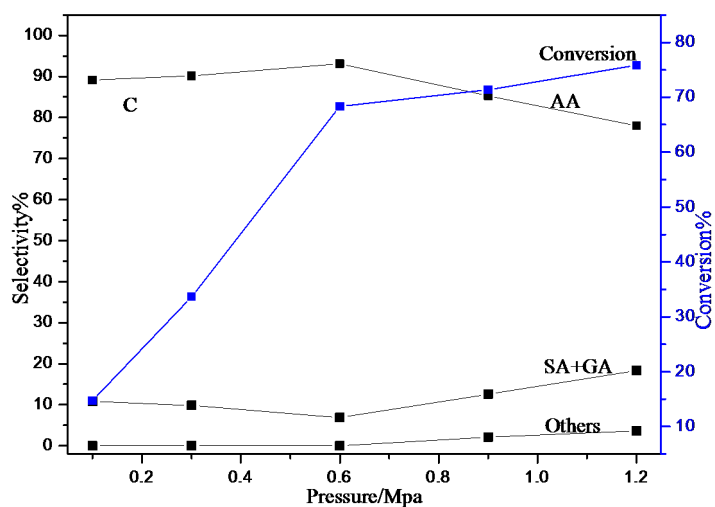

**Fig. S2** Effect of the reaction pressure on the conversion of cyclohexanone and AA selectivity over the synthesized 5% Mn-HTS. (reaction conditions: 40 g cyclohexanone; GA+SA: glutarate acid and succinate acid; Others include CO<sub>2</sub> and CO).

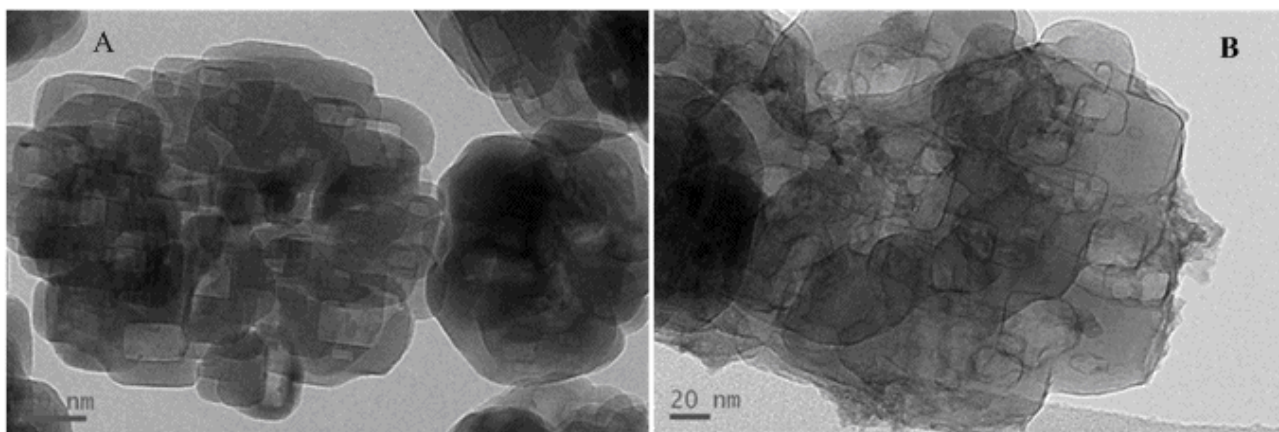

**Fig. S3** TEM images of the reused Mn-HTS(5%)

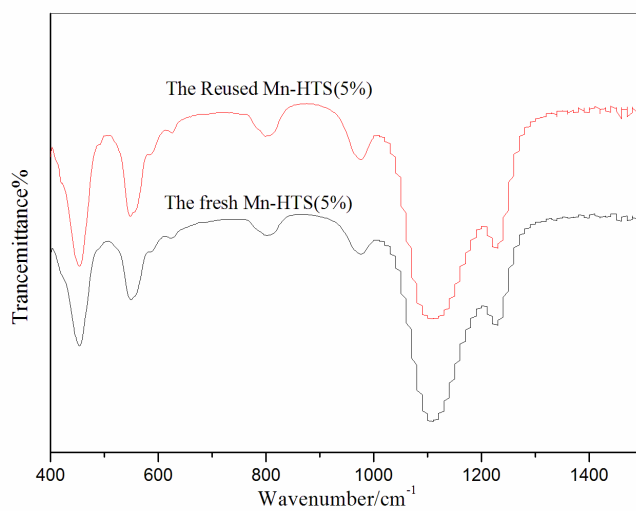

**Fig. S4** FT-IR spectra of the fresh Mn-HTS (5%) and the reused Mn-HTS(5%)
